# Supplementary material for: Hierarchical mesoporous Mn2O3/NiO/Co3O4 nanocubes derived from Prussian blue analogues for high performance asymmetric supercapacitors
Source: Royal Society of Chemistry journal article supplement (doi:10.1039/d4nj04893h), 2025-01-01
Supplement: d4nj04893h1.pdf [file d4nj04893h1.pdf]

# Supplementary Information

## **Hierarchical mesoporous Mn<sub>2</sub>O<sub>3</sub>/NiO/Co<sub>3</sub>O<sub>4</sub> nanocubes derived from Prussian blue analogues for high performance asymmetric supercapacitor**

Song Liu<sup>1\*</sup>, Bingge Li<sup>1</sup>, Ziwei Sun<sup>1</sup>, Xiaojie Liu<sup>1</sup>

1.School of Materials Science and Engineering, Anhui University of Science and Technology,

Huainan, Anhui 232001, P. R. China

\*Corresponding author

E-mail address: [songliu@aust.edu.cn](mailto:songliu@aust.edu.cn)

1.The specific capacitance ( $C_F$ , F g<sup>-1</sup>) from the GCD curve was calculated according the equation:

$$C_F = \frac{I \times \Delta t}{m \times \Delta V} \# (1)$$

Where  $I$  is the discharge current (A),  $\Delta t$  is the discharge time (s), and  $m$  is the mass of the active material (g),  $\Delta V$  is the voltage window (V)

2.Assembly requirements of asymmetric supercapacitors are met according to the mass balance formula in a two-electrode system ( $Q^+ = Q^-$ )

$$\frac{m_+}{m_-} = \frac{C_F^- \times \Delta V^-}{C_F^+ \times \Delta V^+} \# (2)$$

Where  $m$  is the mass (g) of the positive and negative electrodes active materials,  $C_F$  is the specific capacitance (F g<sup>-1</sup>), and  $\Delta V$  is the voltage window (V).

3. The energy density ( $E$ , Wh Kg<sup>-1</sup>) and power density ( $P$ , W Kg<sup>-1</sup>) are calculated from the following two equations

$$E = \frac{\int IV(t)dt}{3.6} \# (3)$$

$$P = \frac{3600 \times E}{\Delta t} \# (4)$$

Where  $I$ ,  $V$  and  $\Delta t$  are the discharge current (A), voltage (V) and discharge duration (s) of asymmetric supercapacitors.

### 2.3 Materials characterization

Thermogravimetric analysis (TG) was performed using an SDT-Q600 instrument in air from 25 °C to 500 °C with a heating rate of 5 °C min<sup>-1</sup>. The crystal structure and surface morphology of products were examined by X-ray diffractometer (XRD, Smartlab SE), field emission scanning electron microscopy (FESEM, Zeiss, Gemini Sigma 300/VP) and transmission electron microscopy (TEM, FEI Talos F200X). The elemental composition was investigated by X-ray photoelectron spectroscopy (XPS, ESCALAB 250Xi). The specific surface areas and pore distribution of the samples were characterized by using a V-Sorb 2800 P nitrogen desorption/absorption instrument.

### 2.4 Electrochemical measurement

All electrochemical tests were performed on a CHI660E workstation with an electrolyte of 3 M KOH. Powder samples (80%), acetylene black (10%), and polytetrafluoroethylene (10%) were mixed in an onyx mortar and ground to slurry with a few drops of N-methyl pyrrolidone. Then the slurry was coated on 1 cm<sup>2</sup> nickel foam. Hg/HgO and Pt electrodes were invoked as reference and counter electrodes.

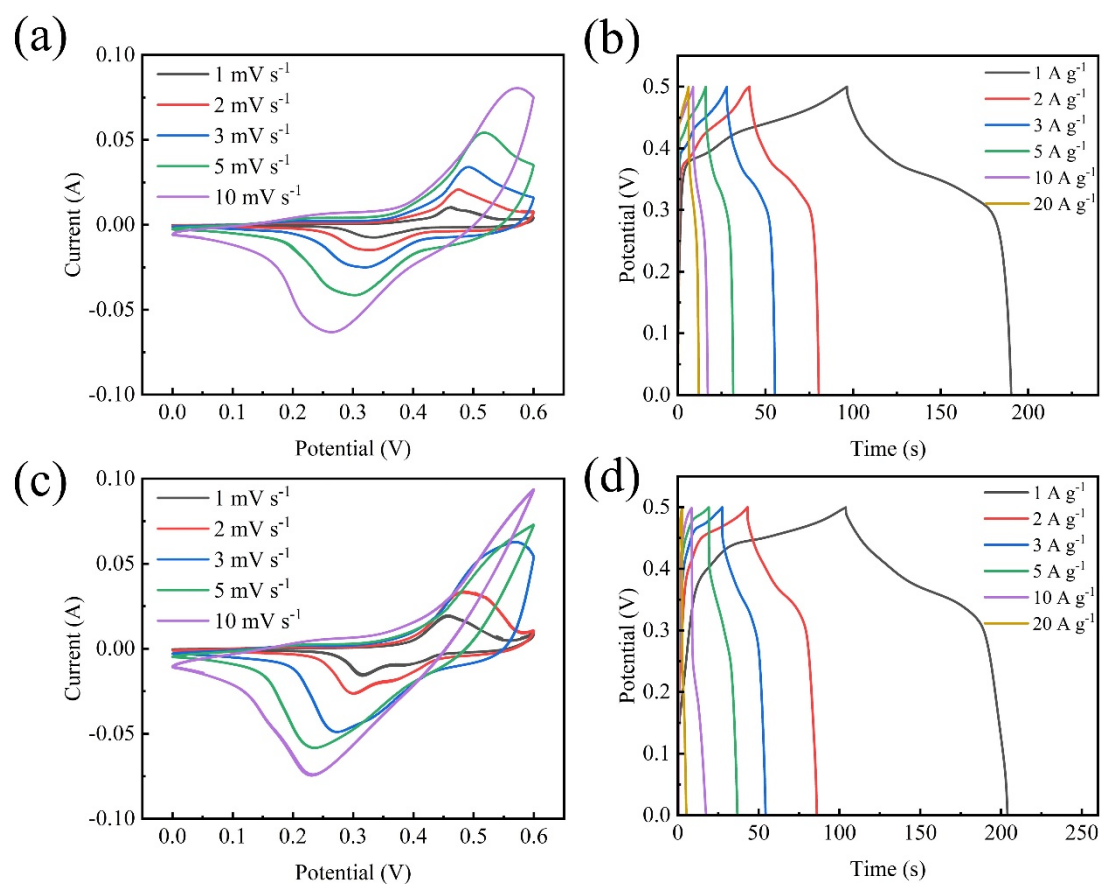

Figure S1 CV and GCD curves of (a) and (b)  $\text{Mn}_2\text{O}_3/\text{Co}_3\text{O}_4$ , (c) and (d)  $\text{NiO}/\text{Co}_3\text{O}_4$ .

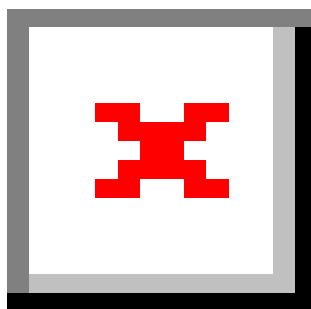

Figure S2 Specific capacitance of  $\text{Mn}_2\text{O}_3/\text{Co}_3\text{O}_4$ ,  $\text{NiO}/\text{Co}_3\text{O}_4$  and  $\text{Mn}_2\text{O}_3/\text{NiO}/\text{Co}_3\text{O}_4$ .
